# Supplementary material for: Collaborating with transgender youth to educate healthcare trainees and professionals: randomized controlled trial of a didactic enhanced by brief videos
Source: Springer Nature journal article supplement (doi:10.1186/s12889-022-14791-5), 2022-12-26
Supplement: MOESM1 [file 23858906]

**SUPPLEMENTAL TABLE 1**

**Transgender Knowledge, Attitudes, and Beliefs (T-KAB): subscales and component items**

| Subscale / component items†                                                                       | TgV (n = 46) |      |         | CgV (n = 46) |      |        | CgN (n = 44) |      |        | All (n = 136) |      |         |
|---------------------------------------------------------------------------------------------------|--------------|------|---------|--------------|------|--------|--------------|------|--------|---------------|------|---------|
|                                                                                                   | PRE          | POST | t       | PRE          | POST | t      | PRE          | POST | t      | PRE           | POST | t       |
|                                                                                                   | Mean         | SD   |         | Mean         | SD   |        | Mean         | SD   |        | Mean          | SD   |         |
| <b>Social Tolerance (ST)</b>                                                                      |              |      |         |              |      |        |              |      |        |               |      |         |
| 1 Transgender people should have the opportunity to undergo operations to change their anatomy    | 0.13         | 0.34 | 2.60**  | 0.06         | 0.32 | 1.35   | 0.00         | 0.50 | 0.00   | 0.07          | 0.61 | 1.26    |
| 2 Transgender people should be accepted completely into our society                               | 0.04         | 0.36 | 0.81    | 0.09         | 0.78 | 0.75   | 0.27         | 0.39 | 0.27   | 0.06          | 0.80 | 0.86    |
| 3 Transgender people should have the opportunity to change their name                             | 0.11         | 0.43 | 1.70*   | 0.30         | 1.04 | 1.96*  | 2.35         | 0.01 | 2.35*  | 0.18          | 0.69 | 2.99**  |
| 4 Organizations that promote transgender rights are necessary                                     | 0.02         | 0.33 | 0.44    | -0.02        | 0.33 | -0.44  | 1.67         | 0.05 | 1.67   | 0.03          | 0.34 | 1.00    |
| 5 It should be illegal for people to have their genitalia surgically altered (R)                  | 0.09         | 0.78 | 0.75    | -0.02        | 0.90 | -0.16  | -1.95        | 0.03 | -1.95* | -0.07         | 0.73 | -1.18   |
| 6 Being transgender is a sin (R)                                                                  | 0.07         | 0.44 | 1.00    | -0.02        | 0.71 | -0.21  | 0.00         | 0.50 | 0.00   | 0.02          | 0.49 | 0.35    |
| 7 Transgender people are a worthwhile part of our society                                         | 0.02         | 0.15 | 1.00    | 0.06         | 0.25 | 1.77*  | 0.00         | 0.30 | 0.00   | 0.03          | 0.21 | 1.64    |
| <b>Comfort and contact (CC)</b>                                                                   |              |      |         |              |      |        |              |      |        |               |      |         |
| 1 I avoid interacting with people whose gender is unclear to me (R)                               | 0.04         | 0.92 | 0.32    | 0.00         | 0.47 | 0.00   | -0.31        | 0.38 | -0.31  | 0.00          | 0.82 | 0.00    |
| 2 People with both breasts and a penis make me uncomfortable (R)                                  | 0.24         | 1.20 | 1.36    | 0.00         | 0.75 | 0.00   | 0.66         | 0.26 | 0.66   | 0.11          | 0.97 | 1.32    |
| 3 When I meet someone, it is important for me to be able to identify them as a man or a woman (R) | 0.48         | 0.69 | 4.70*** | 0.26         | 0.71 | 2.48** | 1.35         | 0.09 | 1.35   | 0.32          | 0.86 | 4.39*** |
| 4 I feel uncomfortable when I cannot tell if someone is a man or a woman (R)                      | 0.35         | 1.02 | 2.32*   | 0.34         | 0.82 | 2.86** | 3.17         | 0.00 | 3.17** | 0.39          | 0.94 | 4.81*** |
| 5 I would feel uncomfortable if a close family member were dating a transgender person (R)        | 0.11         | 0.95 | 0.78    | 0.09         | 1.63 | 0.36   | 2.56         | 0.01 | 2.56** | 0.18          | 1.22 | 1.75    |
| 6 I would feel comfortable if I learned my neighbor is transgender                                | 0.04         | 2.05 | 0.14    | -0.02        | 1.74 | -0.08  | -0.09        | 0.47 | -0.09  | 0.00          | 1.84 | 0.00    |
| 7 I would feel comfortable if I learned my neighbor is transgender                                | 0.07         | 2.00 | 0.22    | -0.21        | 1.38 | -1.06  | 1.46         | 0.08 | 1.46   | 0.12          | 1.97 | 0.70    |
| <b>Acceptance of the gender spectrum subscale (ACC)</b>                                           |              |      |         |              |      |        |              |      |        |               |      |         |
| 1 A person with a vagina can be a man                                                             | 0.48         | 1.03 | 3.16**  | 0.32         | 1.02 | 2.14*  | 2.49         | 0.01 | 2.49** | 0.36          | 0.94 | 4.469** |
| 2 A person with a penis can be a woman                                                            | 0.33         | 0.60 | 3.70*** | 0.21         | 0.66 | 2.22*  | 0.78         | 0.22 | 0.78   | 0.22          | 0.76 | 3.34*** |
| 3 Female-to-male transgender people are real men                                                  | 0.20         | 0.45 | 2.93**  | 0.13         | 1.14 | 0.77   | 1.23         | 0.11 | 1.23   | 0.15          | 0.82 | 2.18*   |
| 4 Male-to-female transgender people are real women                                                | 0.13         | 0.45 | 1.96*   | 0.11         | 1.11 | 0.66   | 2.21         | 0.02 | 2.21*  | 0.13          | 0.74 | 1.98*   |
| 5 A person transitioning from female to male should be able to use a men's bathroom               | 0.17         | 0.49 | 2.43*   | 0.15         | 0.47 | 2.20*  | 1.35         | 0.09 | 1.35   | 0.13          | 0.44 | 3.54*** |
| 6 There are only two genders: male and female (R)                                                 | 0.20         | 0.62 | 2.14*   | 0.21         | 0.46 | 3.15** | 2.46         | 0.01 | 2.46** | 0.19          | 0.51 | 4.38*** |
| 7 Sex and gender are the same thing (R)                                                           | 0.07         | 1.41 | 0.32    | 0.23         | 0.60 | 2.69** | 2.20         | 0.02 | 2.20*  | 0.15          | 0.93 | 1.95*   |
| 8 A person transitioning from male to female should be able to use a women's bathroom             | 0.15         | 0.47 | 2.20*   | 0.11         | 0.43 | 1.70*  | 1.95         | 0.03 | 1.95   | 0.13          | 0.43 | 3.34*** |

† Higher scores indicate greater knowledge and more accepting attitudes/beliefs towards transgender individuals. Items are scored on a 6-point Likert scale ranging from 1 ("strongly disagree") to 6 ("strongly agree"). (R) denotes reverse-scored items (Clark & Hughto, 2020)

\* p < 0.05

\*\* p < 0.01

\*\*\* p < 0.001
